# Supplementary material for: High residual carriage of vaccine-serotype Streptococcus pneumoniae after introduction of pneumococcal conjugate vaccine in Malawi
Source: PubMed Central journal article supplement (PMC7203201; doi:10.1038/s41467-020-15786-9), 2020-05-06
Supplement: 41467_2020_15786_MOESM1_ESM.pdf [file 41467_2020_15786_MOESM1_ESM.pdf]

## **Supplementary Information**

Residual carriage of vaccine-serotype *Streptococcus pneumoniae* after introduction of a pneumococcal conjugate vaccine in Malawi

Swarthout, T. D. et al.

**Supplementary Table 1. Regional differences in vaccine formulations and schedules**

| Country                  | WHO region | World Bank income group | Year PCV introduced | Current formulation | Current dosing schedule | Current timing             | Initial formulation (if different than current) |
|--------------------------|------------|-------------------------|---------------------|---------------------|-------------------------|----------------------------|-------------------------------------------------|
| Central African Republic | AFRO       | Low income              | 2011                | PCV13               | 3+0                     | 6, 10, 14 weeks            | --                                              |
| Ethiopia                 | AFRO       | Low income              | 2011                | PCV10               | 3+0                     | 6, 10, 14 weeks            | --                                              |
| Gambia                   | AFRO       | Low income              | 2009                | PCV13               | 3+0                     | 2, 3, 4 months             | PCV7                                            |
| Kenya                    | AFRO       | Lower middle income     | 2011                | PCV10               | 3+0                     | 6, 10, 14 weeks            | --                                              |
| Lesotho                  | AFRO       | Lower middle income     | 2015                | PCV13               | 3+0                     | 6, 10, 14 weeks            | --                                              |
| Madagascar               | AFRO       | Low income              | 2012                | PCV10               | 3+0                     | 6, 10, 14 weeks            | --                                              |
| Mozambique               | AFRO       | Low income              | 2013                | PCV13               | 3+0                     | 6, 10, 14 weeks            | PCV10                                           |
| Namibia                  | AFRO       | Upper middle income     | 2014                | PCV13               | 3+0                     | 6, 10, 14 weeks            | --                                              |
| Rwanda                   | AFRO       | Low income              | 2009                | PCV13               | 3+0                     | 6, 10, 14 weeks            | PCV7                                            |
| South Africa             | AFRO       | Upper middle income     | 2009                | PCV13               | 2+1                     | 6, 14 weeks & 9 months     | PCV7                                            |
| Tanzania                 | AFRO       | Low income              | 2012                | PCV13               | 3+0                     | 6, 10, 14 weeks            | --                                              |
| Uganda                   | AFRO       | Low income              | 2013                | PCV10               | 3+0                     | 6, 10, 14 weeks            | --                                              |
| Zambia                   | AFRO       | Lower middle income     | 2013                | PCV10               | 3+0                     | 6, 10, 14 weeks            | --                                              |
| Zimbabwe                 | AFRO       | Lower middle income     | 2012                | PCV13               | 3+0                     | 6, 10, 14 weeks            | --                                              |
| Canada*                  | AMRO       | High income             | 2002                | PCV13               | 2+1                     | 2, 4, 6 months             | PCV7                                            |
|                          |            |                         |                     |                     | 3+1                     | 2, 4, 6, & 12-18 months    | --                                              |
| Haiti                    | AMRO       | Low income              | 2018                | PCV13               | 3+0                     | 6, 10, 14 weeks            | --                                              |
| Mexico                   | AMRO       | Upper middle income     | 2008                | PCV13               | 2+1                     | 2, 4, & 12 months          | PCV7                                            |
| Nicaragua                | AMRO       | Lower middle income     | 2010                | PCV13               | 3+0                     | 2, 4, 6 months             | --                                              |
| United States            | AMRO       | High income             | 2000                | PCV13               | 3+1                     | 2, 4, 6 & >12 months       | PCV7                                            |
| Kuwait                   | EMRO       | High income             | 2007                | PCV13               | 3+1                     | 2, 4, 6 & 18 months        | PCV7                                            |
| Morocco                  | EMRO       | Lower middle income     | 2010                | PCV10               | 2+1                     | 2, 4 & 12 months           | --                                              |
| Saudi Arabia             | EMRO       | High income             | 2009                | PCV13               | 3+1                     | 2, 4, 6 & 12 months        | PCV7                                            |
| Denmark                  | EURO       | High income             | 2007                | PCV13               | 2+1                     | 3, 5 & 12 months           | --                                              |
| France                   | EURO       | High income             | 2006                | PCV13               | 2+1                     | 2, 4 & 11 months           | PCV7                                            |
| Germany                  | EURO       | High income             | 2006                | PCV13               | 2+1                     | 2, 4 & 11-14 months        | PCV7                                            |
| Ireland                  | EURO       | High income             | 2008                | PCV13               | 2+1                     | 2, 6 & 12 months           | PCV7                                            |
| Israel                   | EURO       | High income             | 2009                | PCV13               | 2+1                     | 2, 4 & 12 months           | PCV7                                            |
| Italy                    | EURO       | High income             | 2005                |                     | 2+1                     | 3, 5-6 & 11-13 months      | PCV7                                            |
| Netherlands              | EURO       | High income             | 2006                | PCV10               | 2+1 (3+1)               | 2, 4 & 11 months           | PCV7                                            |
| Portugal                 | EURO       | High income             | 2015                | PCV13               | 2+1                     | 2, 4 & 12 months           | --                                              |
| Russian Federation       | EURO       | Upper middle income     | 2014                | PCV13               | 2+1                     | 2, 4.5 & 15 months         | PCV10                                           |
| Spain                    | EURO       | High income             | 2001                | PCV13               | 2+1 (3+1)               | 2, 4 & 12 months           | PCV7                                            |
| Switzerland              | EURO       | High income             | 2006                | PCV13               | 2+1                     | 2, 4 & 12 months           | PCV7                                            |
| United Kingdom           | EURO       | High income             | 2006                | PCV13               | 2+1                     | 2, 4 & 13 months           | PCV7                                            |
| Bangladesh               | SEARO      | Lower middle income     | 2015                | PCV10               | 3+0                     | 6, 10, 14 weeks            | --                                              |
| India                    | SEARO      | Lower middle income     | 2017                | PCV13               | 2+1                     | 6, 14 weeks & 9 months     | --                                              |
| Indonesia                | SEARO      | Lower middle income     | 2018                | PCV13               | 2+1                     | 2, 3 & 12 months           | --                                              |
| Myanmar                  | SEARO      | Lower middle income     | 2016                | PCV13               | 3+0                     | 2, 4, 6 months             | PCV10                                           |
| Nepal                    | SEARO      | Low income              | 2015                | PCV10               | 2+1                     | 6, 10 weeks & 9 months     | --                                              |
| Australia                | WPRO       | High income             | 2005                | PCV13               | 2+1                     | 2, 4, & 12 months          | PCV7                                            |
| Cambodia                 | WPRO       | Lower middle income     | 2015                | PCV13               | 3+0                     | 6, 10, 14 weeks            | --                                              |
| Fiji                     | WPRO       | Upper middle income     | 2012                | PCV10               | 3+0                     | 6, 10, 14 weeks            | --                                              |
| Japan                    | WPRO       | High income             | 2011                | PCV13               | 3+1                     | 2, 3, 4 months & 1 year    | PCV7                                            |
| New Zealand              | WPRO       | High income             | 2008                | PCV13               | 3+1                     | 6 weeks, 3, 5, & 15 months | PCV7                                            |

Data collected from: <http://www.view-hub.org/>

\*Canada: According to Jan 2016 schedule, Northwest Territories and Nunavut province use a 3+1 schedule (2, 4, 6, 18 months); all the other provinces use a 2+1 schedule (either 2, 4, 12 months or 2, 4, 18 months).

**Supplementary Table 2. Regional VT carriage prevalence, pre- and post-PCV introduction**

| Country     | Region | Carriage Prevalence |              | Percent Reduction | Time (years) since PCV introduction |         | Age   | PCV | Ref |
|-------------|--------|---------------------|--------------|-------------------|-------------------------------------|---------|-------|-----|-----|
|             |        | Pre-Vaccine         | Post-Vaccine |                   | Age                                 | PCV     |       |     |     |
| Fiji        | WPRO   | 22.3                | 5.8          | 74.0              | 3                                   | 12-23 m | PCV10 | [1] |     |
| Australia   | WPRO   | 23.7                | 12.0         | 49.4              | 1.5                                 | < 5y    | PCV13 | [2] |     |
| Mozambique  | AFRO   | 35.1                | 20.9         | 40.5              | 2                                   | 24-59 m | PCV10 | [3] |     |
| Kenya       | AFRO   | 33.8                | 13           | 61.5              | 2                                   | < 5y    | PCV10 | [4] |     |
| Kenya       | AFRO   | "                   | 8.8          | 73.9              | 5                                   | "       | "     | "   |     |
| Malawi      | AFRO   | 28.2                | 17.9         | 36.6              | 4.5                                 | 1-4 y   | PCV13 | [5] |     |
| USA         | AMRO   | 55.4                | 10.9         | 80.3              | 2                                   | <5 y    | PCV7  | [6] |     |
| USA         | AMRO   | "                   | 4.8          | 91.4              | 3                                   | "       | "     | "   |     |
| Netherlands | EURO   | 38                  | 8            | 80.1              | 3                                   | 11 m    | PCV7  | [7] |     |
| Netherlands | EURO   | 36                  | 4            | 88.1              | 3                                   | 2 y     | PCV7  | "   |     |
| UK          | EURO   | 31.9                | 4.2          | 86.4              | 7                                   | <5 y    | PCV7  | [8] |     |
| UK          | EURO   | "                   | 0.4          | 98.9              | 11                                  | "       | "     | "   |     |
| UK          | EURO   | 39.9                | 1.0          | 97.5              | 7                                   | <5 y    | PCV13 | [9] |     |

"Indicates that the information for this cell is the same as the information in the cell directly above.

**Supplementary Table 3. PCV-vaccinated study groups: Pneumococcal carriage prevalence, stratified by survey**

| 18 weeks – 1 year old<br>(PCV-vaccinated) | Survey 1 <sup>§</sup> | Survey 2 <sup>§</sup> | Survey 3 <sup>§</sup> | Survey 4<br>(n=153) | Survey 5<br>(n=147) | Survey 6<br>(n=139) | Survey 7<br>(n=127) | Total<br>(n=566)  |
|-------------------------------------------|-----------------------|-----------------------|-----------------------|---------------------|---------------------|---------------------|---------------------|-------------------|
| Total carriage                            |                       |                       |                       |                     |                     |                     |                     |                   |
| % (n)                                     | --                    | --                    | --                    | 77.1 (118)          | 82.3 (121)          | 79.1 (110)          | 81.1 (103)          | 79.9 (452)        |
| 95% CI                                    |                       |                       |                       | 69.6, 83.5          | 75.2, 88.1          | 71.4, 85.6          | 73.2, 87.5          | 76.3, 83.1        |
| VT                                        | --                    | --                    | --                    | 19.0 (29)           | 17.7 (26)           | 16.5 (23)           | 15.0 (19)           | 17.1 (97)         |
|                                           |                       |                       |                       | 13.5, 26.0          | 12.3, 24.8          | 11.2, 23.7          | 9.7, 22.3           | 14.2, 20.5        |
| NVT                                       | --                    | --                    | --                    | 58.1 (89)           | 64.6 (95)           | 62.6 (87)           | 66.1 (84)           | 62.7 (355)        |
|                                           |                       |                       |                       | 50.2, 65.8          | 56.6, 72.9          | 54.2, 70.3          | 57.4, 73.9          | 58.6, 66.6        |
| 2 years old<br>(PCV-vaccinated)           | Survey 1 <sup>§</sup> | Survey 2 <sup>§</sup> | Survey 3 <sup>§</sup> | Survey 4<br>(n=124) | Survey 5<br>(n=114) | Survey 6<br>(n=135) | Survey 7<br>(n=126) | Total<br>(n=499)  |
| Total carriage                            |                       |                       |                       |                     |                     |                     |                     |                   |
| % (n)                                     | --                    | --                    | --                    | 78.3 (97)           | 83.3 (95)           | 71.8 (97)           | 75.4 (95)           | 76.9 (384)        |
| 95% CI                                    |                       |                       |                       | 69.9, 85.1          | 75.2, 89.6          | 63.5, 79.2          | 66.9, 82.6          | 73.0, 80.6        |
| VT                                        | --                    | --                    | --                    | 21.8 (27)           | 18.4 (21)           | 18.5 (25)           | 15.1 (19)           | 18.4 (92)         |
|                                           |                       |                       |                       | 15.3, 30.0          | 12.3, 26.7          | 12.8, 26.0          | 9.8, 22.5           | 15.3, 22.1        |
| NVT                                       | --                    | --                    | --                    | 56.5 (70)           | 64.9 (74)           | 53.3 (72)           | 60.3 (76)           | 58.5 (292)        |
|                                           |                       |                       |                       | 47.6, 64.9          | 55.7, 73.2          | 44.9, 61.6          | 51.5, 68.5          | 54.1, 62.8        |
| 3–7 years old<br>(PCV-vaccinated)         | Survey 1<br>(n=286)   | Survey 2<br>(n=303)   | Survey 3<br>(n=361)   | Survey 4<br>(n=380) | Survey 5<br>(n=382) | Survey 6<br>(n=475) | Survey 7<br>(n=378) | Total<br>(n=2565) |
| Total carriage                            |                       |                       |                       |                     |                     |                     |                     |                   |
| % (n)                                     | 84.2 (241)            | 76.0 (230)            | 78.1 (282)            | 66.8 (254)          | 80.4 (307)          | 61.7 (293)          | 78.1 (295)          | 74.2 (1902)       |
| 95% CI                                    | 79.5, 88.3            | 70.7, 80.6            | 73.5, 82.3            | 61.9, 71.6          | 76.0, 84.2          | 57.4, 66.1          | 73.5, 82.1          | 72.4, 75.8        |
| VT                                        | 19.9 (57)             | 20.5 (62)             | 20.8 (75)             | 17.6 (67)           | 19.4 (74)           | 13.3 (63)           | 16.7 (63)           | 18.0 (461)        |
|                                           | 15.7, 25.0            | 16.3, 25.4            | 16.9, 25.3            | 14.1, 21.8          | 15.7, 23.7          | 10.5, 16.6          | 13.2, 20.8          | 16.5, 19.5        |
| NVT                                       | 64.3 (184)            | 55.5 (168)            | 57.3 (207)            | 49.2 (187)          | 61.0 (233)          | 48.4 (230)          | 61.4 (232)          | 56.2 (1441)       |
|                                           | 58.6, 69.7            | 49.8, 61.0            | 52.2, 62.4            | 44.2, 54.2          | 56.0, 65.8          | 43.9, 52.9          | 56.4, 66.2          | 54.2, 58.1        |

<sup>§</sup> There was no recruitment for these age groups during these surveys. CI=confidence interval. VT=vaccine serotype. NVT=non-vaccine serotype.

**Supplementary Table 4. PCV-unvaccinated study groups: Pneumococcal carriage prevalence, stratified by survey**

| 4-8 weeks old<br>(PCV-unvaccinated)   | Survey 1 <sup>§</sup>    | Survey 2 <sup>§</sup>   | Survey 3 <sup>§</sup>   | Survey 4 <sup>§</sup>   | Survey 5<br>(n=121)     | Survey 6<br>(n=133)     | Survey 7<br>(n=92)      | Total<br>(n=346)         |
|---------------------------------------|--------------------------|-------------------------|-------------------------|-------------------------|-------------------------|-------------------------|-------------------------|--------------------------|
| Total carriage                        |                          |                         |                         |                         |                         |                         |                         |                          |
| % (n)                                 | -                        | -                       | -                       | -                       | 42.9 (52)               | 30.8 (41)               | 57.6 (53)               | 42.2 (146)               |
| 95% CI                                |                          |                         |                         |                         | 34.0, 52.3              | 23.1, 39.4              | 46.9, 67.9              | 36.9, 47.6               |
| VT                                    |                          |                         |                         |                         | 10.7 (13)<br>6.3, 17.7  | 6.0 (8)<br>3.0, 11.6    | 8.7 (8)<br>4.4, 16.5    | 8.4 (29)<br>5.7, 11.8    |
| NVT                                   |                          |                         |                         |                         | 32.2 (39)<br>24.5, 41.1 | 24.8 (33)<br>18.2, 32.9 | 48.9 (45)<br>38.8, 59.1 | 33.8 (117)<br>28.8, 39.1 |
| 3-10 years old<br>(PCV-unvaccinated)  | Survey 1<br>(n=255)      | Survey 2<br>(n=231)     | Survey 3<br>(n=242)     | Survey 4<br>(n=198)     | Survey 5<br>(n=106)     | Survey 6<br>(n=173)     | Survey 7<br>(n=197)     | Total<br>(n=1402)        |
| Total carriage                        |                          |                         |                         |                         |                         |                         |                         |                          |
| % (n)                                 | 68.3 (174)               | 62.4 (144)              | 58.7 (142)              | 37.8 (75)               | 58.5 (62)               | 48.6 (84)               | 57.4 (113)              | 56.7 (794)               |
| 95% CI                                | 62.1, 73.9               | 55.7, 68.6              | 52.2, 64.9              | 31.1, 45.0              | 48.5, 68.0              | 40.9, 56.3              | 50.1, 64.4              | 53.9, 59.2               |
| VT                                    | 27.5 (70)<br>22.3, 33.3  | 21.7 (50)<br>16.7, 27.4 | 19.4 (47)<br>14.9, 24.9 | 14.1 (28)<br>9.9, 19.7  | 10.4 (11)<br>5.8, 17.8  | 11.0 (19)<br>7.1, 16.6  | 15.2 (30)<br>10.8, 21.0 | 18.2 (255)<br>16.2, 20.3 |
| NVT                                   | 40.8 (104)<br>34.9, 46.9 | 40.7 (94)<br>34.5, 47.2 | 39.3 (95)<br>33.2, 45.6 | 23.7 (47)<br>18.3, 30.2 | 48.1 (51)<br>38.7, 57.6 | 37.6 (65)<br>30.6, 45.0 | 42.1 (83)<br>35.4, 49.2 | 38.5 (539)<br>35.9, 41.0 |
| 18-40 years old<br>(PCV-unvaccinated) | Survey 1<br>(n=198)      | Survey 2<br>(n=201)     | Survey 3<br>(n=279)     | Survey 4<br>(n=308)     | Survey 5<br>(n=305)     | Survey 6<br>(n=277)     | Survey 7<br>(n=202)     | Total<br>(n=1770)        |
| Total carriage                        |                          |                         |                         |                         |                         |                         |                         |                          |
| % (n)                                 |                          |                         |                         |                         | 38.4 ( )                | 32.5 (90)               | 38.6 (78)               | 40.4 (714)               |
| 95% CI                                |                          |                         |                         |                         |                         |                         |                         |                          |
| VT                                    | 15.2 (30)<br>10.8, 20.9  | 14.4 (29)<br>10.2, 20.0 | 14.0 (39)<br>10.4, 18.6 | 14.3 (44)<br>10.8, 18.9 | 10.5 (32)<br>7.5, 14.5  | 9.0 (25)<br>6.2, 13.0   | 8.9 (18)<br>5.7, 13.7   | 12.3 (217)<br>10.8, 13.9 |
| NVT                                   | 24.2 (48)<br>18.8, 30.7  | 32.8 (66)<br>26.7, 39.6 | 30.5 (85)<br>25.3, 36.1 | 28.6 (88)<br>23.8, 33.9 | 27.9 (85)<br>23.1, 33.2 | 23.5 (65)<br>18.8, 28.8 | 29.7 (60)<br>23.8, 36.4 | 28.1 (497)<br>26.0, 30.2 |

<sup>§</sup> There was no recruitment for these age groups during these surveys. CI=confidence interval. VT=vaccine serotype. NVT=non-vaccine serotype.

**Supplementary Table 5. Population-based pneumococcal carriage prevalence studies, Malawi**

| Age                                                      | Carriage | Karonga (rural), Malawi <sup>1</sup> |                         | Blantyre (urban), Malawi     |        |
|----------------------------------------------------------|----------|--------------------------------------|-------------------------|------------------------------|--------|
|                                                          |          | 2009-2011<br>Pre PCV intro.          | 2014<br>Post PCV intro. | 2015-2019<br>Post PCV intro. |        |
| 6 weeks old<br>PCV-unvaccinated <sup>2</sup>             | Spn      | 38.6                                 | 43.8                    | 57.3                         |        |
|                                                          | VT       | 11.4                                 | 13.0                    | 8.4                          |        |
|                                                          | NVT      | 27.1                                 | 30.8                    | 48.9                         |        |
|                                                          | Total N  | 70                                   | 146                     | 346                          |        |
| 18 weeks old<br>PCV-vaccinated <sup>3</sup>              | Spn      | 74.7                                 | 50.0                    | 81.8                         |        |
|                                                          | VT       | 45.1                                 | 9.1                     | 16.8                         |        |
|                                                          | NVT      | 29.6                                 | 40.9                    | 65.0                         |        |
|                                                          | Total N  | 71                                   | 44                      | 203                          |        |
| 1-4 years old<br>PCV-unvaccinated and vaccinated         |          |                                      | Unvacc'd                | Vacc'd                       | Vacc'd |
|                                                          | Spn      | 59.4                                 | 63.9                    | 70.0                         | 77.2   |
|                                                          | VT       | 28.2                                 | 22.9                    | 16.5                         | 18.7   |
|                                                          | NVT      | 31.2                                 | 41.0                    | 53.4                         | 58.5   |
| Total N                                                  | 330      | 83                                   | 103                     | 2958                         |        |
| 18 weeks-4years (<5y)<br>PCV-unvaccinated and vaccinated |          |                                      | Unvacc'd <sup>4</sup>   | Vacc'd                       | Vacc'd |
|                                                          | Spn      | 62.1                                 | 63.9                    | 63.9                         | 77.5   |
|                                                          | VT       | 31.2                                 | 22.9                    | 14.3                         | 18.6   |
|                                                          | NVT      | 30.9                                 | 41.0                    | 49.7                         | 58.9   |
| Total N                                                  | 401      | 83                                   | 147                     | 3161                         |        |
| 5-15 years<br>PCV-unvaccinated <sup>5</sup>              | Spn      | 49.5                                 | 37.1                    | 53.8                         |        |
|                                                          | VT       | 21.2                                 | 7.9                     | 16.3                         |        |
|                                                          | NVT      | 28.3                                 | 29.2                    | 37.5                         |        |
|                                                          | Total N  | 325                                  | 89                      | 1748                         |        |

<sup>1</sup> Heinsbroek *et al.* Ref [5]. <sup>2</sup> Blantyre study data includes ages 4 – 8 weeks of age. <sup>3</sup> Blantyre study data includes ages 18 weeks – 12 months of age. <sup>4</sup> No children <1yrs unvaccinated, therefore same results as among children 1-4 years old. <sup>5</sup> Blantyre study data among PCV-unvaccinated is limited to ages 3 – 10 years. PCV=pneumococcal conjugate vaccine. intro.=introduction. Spn=*Streptococcus pneumoniae*. VT=vaccine serotype. NVT=non-vaccine serotype. Vacc'd=PCV-vaccinated. Unvacc'd=PCV-unvaccinated.

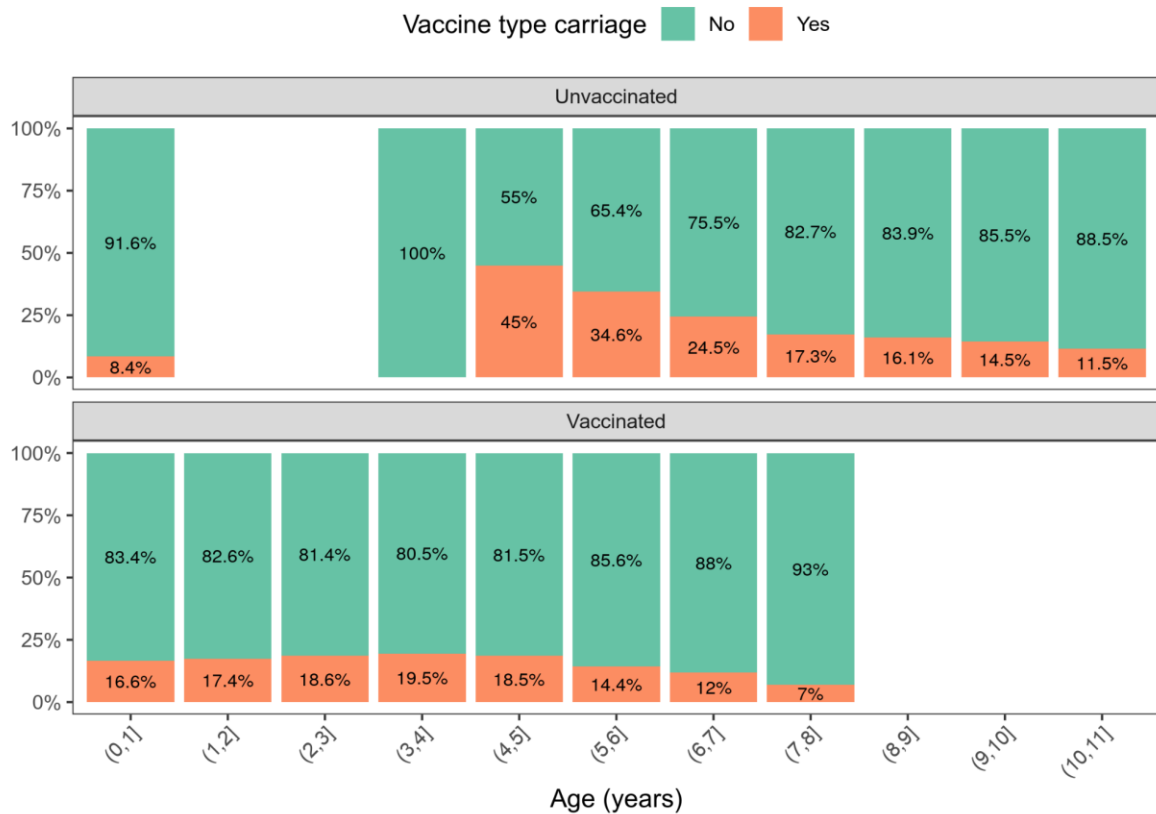

**Supplementary Figure 1. VT and NVT carriage among PCV-vaccinated and PCV-unnvaccinated children.** Proportions reported in the lower (orange) section of each bar represent the prevalence of VT carriage in each age group. Proportions reported in the upper (green) section of each bar represent the prevalence of no VT carriage (NVT + no carriage). The (0, 1] bar among unvaccinated children includes only children 4-8 weeks of age. The (A, B] notation used for each age group includes all children whose age was greater than A and less than or equal to B ( $A < \text{age} \leq B$ ). When modelling the entire range of data (i.e. not censoring at 3-6 years) with an exponential decay curve the estimated decay parameter for vaccinated was not significantly different from zero (i.e. an almost flat curve was the resulting fit). Among PCV-vaccinated children there is an observed increase in pneumococcal carriage until the (3,4] year age range and only then does VT carriage prevalence start to decrease. Our conjecture is that the overall trend in pneumococcal carriage for vaccinated children starting from birth is more complex than an exponential decay curve.

**Supplementary Table 6. Denominator (N) for each age bar in Supplementary Figure 1**

|                 | (0, 1] | (1, 2] | (2, 3] | (3, 4] | (4, 5] | (5, 6] | (6, 7] | (7, 8] | (8, 9] | (9, 10] | (10, 11] |
|-----------------|--------|--------|--------|--------|--------|--------|--------|--------|--------|---------|----------|
| Unvaccinated, N | 346    | --     | --     | 2      | 16     | 136    | 150    | 243    | 302    | 272     | 281      |
| Vaccinated, N   | 203    | 363    | 499    | 1,105  | 991    | 309    | 117    | 43     | --     | --      | --       |

For cells showing '--', there was no recruitment for these age groups.

**Supplementary Table 7. Proportion VT carriage attributed to individual VT (PCV-vaccinated)**

| Vaccine serotype                                     | Survey-1<br>% (n) | Survey-2<br>% (n) | Survey-3<br>% (n) | Survey-4<br>% (n) | Survey-5<br>% (n) | Survey-6<br>% (n) | Survey-7<br>% (n) | Total<br>% (n) |
|------------------------------------------------------|-------------------|-------------------|-------------------|-------------------|-------------------|-------------------|-------------------|----------------|
| <b>Children 18 weeks to 1 year, PCV-vaccinated §</b> |                   |                   |                   |                   |                   |                   |                   |                |
| 1                                                    | --                | --                | --                | 0                 | 0                 | (4.4) 1           | 0                 | 1.0 (1)        |
| 3                                                    | --                | --                | --                | 6.9 (2)           | 7.7 (2)           | 8.7 (2)           | 21.0 (4)          | 10.3 (10)      |
| 4                                                    | --                | --                | --                | 0                 | 0                 | 0                 | 5.3 (1)           | 1.0 (1)        |
| 5                                                    | --                | --                | --                | 0                 | 0                 | 0                 | 0                 | 0              |
| 6A                                                   | --                | --                | --                | 20.7 (6)          | 15.4 (4)          | 21.7 (5)          | 15.8 (3)          | 18.6 (18)      |
| 6B                                                   | --                | --                | --                | 13.8 (4)          | 3.9 (1)           | 0                 | 0                 | 5.2 (5)        |
| 7F                                                   | --                | --                | --                | 0                 | 3.9 (1)           | 0                 | 0                 | 1.0 (1)        |
| 9V                                                   | --                | --                | --                | 3.5 (1)           | 7.7 (2)           | 4.4 (1)           | 5.3 (1)           | 5.2 (5)        |
| 14                                                   | --                | --                | --                | 13.8 (4)          | 15.4 (4)          | 34.8 (8)          | 26.3 (5)          | 21.7 (21)      |
| 18C                                                  | --                | --                | --                | 0                 | 0                 | 0                 | 5.3 (1)           | 1.0 (1)        |
| 19A                                                  | --                | --                | --                | 13.8 (4)          | 3.9 (1)           | 8.7 (2)           | 0                 | 7.2 (7)        |
| 19F                                                  | --                | --                | --                | 13.8 (4)          | 23.1 (6)          | 17.4 (4)          | 10.5 (2)          | 16.5 (16)      |
| 23F                                                  | --                | --                | --                | 13.8 (4)          | 19.2 (5)          | 0                 | 10.5 (2)          | 11.3 (11)      |
| Total                                                | --                | --                | --                | 100 (29)          | 100 (26)          | 100 (23)          | 100 (19)          | 100 (97)       |
| <b>Children 2 years, PCV-vaccinated §</b>            |                   |                   |                   |                   |                   |                   |                   |                |
| 1                                                    | --                | --                | --                | 0                 | (2)               | 0                 | 0                 | 2.2 (2)        |
| 3                                                    | --                | --                | --                | 18.5 (5)          | 14.3 (3)          | 16.0 (4)          | 10.5 (2)          | 15.2 (14)      |
| 4                                                    | --                | --                | --                | 0                 | 0                 | 0                 | 10.5 (2)          | 2.2 (2)        |
| 5                                                    | --                | --                | --                | (0)               | (0)               | (0)               | (0)               | (0)            |
| 6A                                                   | --                | --                | --                | 22.2 (6)          | 9.5 (2)           | 8.0 (2)           | 15.8 (3)          | 14.1 (13)      |
| 6B                                                   | --                | --                | --                | (0)               | (0)               | (0)               | (0)               | (0)            |
| 7F                                                   | --                | --                | --                | (0)               | (0)               | (0)               | (0)               | (0)            |
| 9V                                                   | --                | --                | --                | 7.4 (2)           | 9.5 (2)           | 0                 | 5.3 (1)           | 5.4 (5)        |
| 14                                                   | --                | --                | --                | 11.1 (3)          | 14.3 (3)          | 28.0 (7)          | 21.1 (4)          | 18.5 (17)      |
| 18C                                                  | --                | --                | --                | 3.7 (1)           | 4.8 (1)           | 4.0 (1)           | 0                 | 3.3 (3)        |
| 19A                                                  | --                | --                | --                | 7.4 (2)           | 0                 | 4.0 (1)           | 5.3 (1)           | 4.4 (4)        |
| 19F                                                  | --                | --                | --                | 25.9 (7)          | 14.3 (3)          | 28.0 (7)          | 26.3 (5)          | 23.9 (22)      |
| 23F                                                  | --                | --                | --                | 3.7 (1)           | 23.8 (5)          | 12.0 (3)          | 5.3 (1)           | 10.9 (10)      |
| Total                                                | --                | --                | --                | (100) 27          | (100) 21          | (100) 25          | (100) 19          | (100) 92       |
| <b>Children 3-7 years, PCV-vaccinated</b>            |                   |                   |                   |                   |                   |                   |                   |                |
| 1                                                    | 5.3 (3)           | 1.6 (1)           | 1.3 (1)           | 0                 | 4.1 (3)           | 1.6 (1)           | 0                 | 2.0 (9)        |
| 3                                                    | 17.5 (10)         | 22.6 (14)         | 25.3 (19)         | 17.9 (12)         | 24.3 (18)         | 11.1 (7)          | 25.4 (16)         | 20.8 (96)      |
| 4                                                    | 0                 | 3.2 (2)           | 1.3 (1)           | 0                 | 0                 | 6.4 (4)           | (0)               | 1.5 (7)        |
| 5                                                    | 3.5 (2)           | 4.8 (3)           | 0                 | 1.5 (1)           | 0                 | 1.6 (1)           | 0                 | 1.5 (7)        |
| 6A                                                   | 14.0 (8)          | 6.5 (4)           | 12.0 (9)          | 9.0 (6)           | 9.5 (7)           | 17.5 (11)         | 6.4 (4)           | 10.6 (49)      |
| 6B                                                   | 1.8 (1)           | 4.8 (3)           | 6.7 (5)           | 1.5 (1)           | 2.7 (2)           | 1.6 (1)           | 3.2 (2)           | 3.3 (15)       |
| 7F                                                   | 0                 | 0                 | 0                 | 1.5 (1)           | 0                 | 1.6 (1)           | 0                 | 0.4 (2)        |
| 9V                                                   | 3.5 (2)           | 6.5 (4)           | 1.3 (1)           | 3.0 (2)           | 4.1 (3)           | 4.8 (3)           | 6.4 (4)           | 4.1 (19)       |
| 14                                                   | 8.8 (5)           | 11.3 (7)          | 6.7 (5)           | 14.9 (10)         | 10.8 (8)          | 14.3 (9)          | 19.1 (12)         | 12.2 (56)      |
| 18C                                                  | 1.8 (1)           | 0                 | 4.0 (3)           | 3.0 (2)           | 1.4 (1)           | 3.2 (2)           | 3.2 (2)           | 2.4 (11)       |
| 19A                                                  | 7.0 (4)           | 12.9 (8)          | 9.3 (7)           | 6.0 (4)           | 6.8 (5)           | 1.6 (1)           | 1.6 (1)           | 6.5 (30)       |
| 19F                                                  | 24.6 (14)         | 8.1 (5)           | 21.3 (16)         | 28.4 (19)         | 13.5 (10)         | 17.5 (11)         | 23.8 (15)         | 19.5 (90)      |
| 23F                                                  | 12.3 (7)          | 17.7 (11)         | 10.7 (8)          | 13.4 (9)          | 23.0 (17)         | 17.5 (11)         | 11.1 (7)          | 15.2 (70)      |
| Total                                                | 100 (57)          | 100 (62)          | 100 (75)          | 100 (67)          | 100 (74)          | 100 (63)          | 100 (63)          | 100 (461)      |

§ There was no recruitment of these age groups during surveys 1-3.

Supplementary tables 7 and 8 show the proportion of total VT carriage attributed to individual vaccine serotypes, among PCV-vaccinated and PCV-unvaccinated children, respectively. Low sample sizes do not allow for a robust analysis of relative change over time. Children 18 weeks to 2 years of age were recruited starting survey 4. The denominator is the total VTs identified in each survey. Surveys 1-7 spanned a period of 3.6 to 7.1 years after Malawi's 12 November 2011 introduction of PCV. For total sample size per survey, refer to Supplementary tables 3 and 4.

**Supplementary Table 8. Proportion VT carriage attributed to individual VT (PCV-unvaccinated)**

| Vaccine serotype                                                 | Survey-1<br>% (n) | Survey-2<br>% (n) | Survey-3<br>% (n) | Survey-4<br>% (n) | Survey-5<br>% (n) | Survey-6<br>% (n) | Survey-7<br>% (n) | Total<br>% (n) |
|------------------------------------------------------------------|-------------------|-------------------|-------------------|-------------------|-------------------|-------------------|-------------------|----------------|
| <b>Infants 4-8 weeks, PCV-unvaccinated<sup>§</sup></b>           |                   |                   |                   |                   |                   |                   |                   |                |
| 1                                                                | --                | --                | --                | --                | 0                 | 0                 | 0                 | 0              |
| 3                                                                | --                | --                | --                | --                | 7.7 (1)           | 0                 | 12.5 (1)          | 6.7 (2)        |
| 4                                                                | --                | --                | --                | --                | 0                 | 0                 | 0                 | 0              |
| 5                                                                | --                | --                | --                | --                | 0                 | 0                 | 0                 | 0              |
| 6A                                                               | --                | --                | --                | --                | 15.4 (2)          | 25.0 (2)          | 0                 | 4 (13.3)       |
| 6B                                                               | --                | --                | --                | --                | 7.7 (1)           | 0                 | 37.5 (3)          | 4 (13.3)       |
| 7F                                                               | --                | --                | --                | --                | 0                 | 0                 | 0                 | 0              |
| 9V                                                               | --                | --                | --                | --                | 7.7 (1)           | 0                 | 0                 | 1 (3.3)        |
| 14                                                               | --                | --                | --                | --                | 7.7 (1)           | 25.0 (2)          | 12.5 (1)          | 13.3 (4)       |
| 18C                                                              | --                | --                | --                | --                | 7.7 (1)           | 12.5 (1)          | 0                 | 6.7 (2)        |
| 19A                                                              | --                | --                | --                | --                | 0                 | 0                 | 0                 | 0              |
| 19F                                                              | --                | --                | --                | --                | 15.4 (2)          | 25.0 (2)          | 25.0 (2)          | 20.0 (6)       |
| 23F                                                              | --                | --                | --                | --                | 30.8 (4)          | 12.5 (1)          | 12.5 (1)          | 23.3 (6)       |
| Total                                                            | --                | --                | --                | --                | 100 (13)          | 100 (8)           | 100 (8)           | 100 (29)       |
| <b>Children 3-10 years, PCV-unvaccinated</b>                     |                   |                   |                   |                   |                   |                   |                   |                |
| 1                                                                | 14.3 (10)         | 6.0 (3)           | 2.1 (1)           | 0                 | 0                 | 5.3 (1)           | 0                 | 5.6 (15)       |
| 3                                                                | 12.9 (9)          | 20.0 (10)         | 23.4 (11)         | 14.3 (4)          | 0                 | 26.3 (5)          | 6.7 (2)           | 16.1 (41)      |
| 4                                                                | 5.7 (4)           | 2.0 (1)           | 10.6 (5)          | 7.1 (2)           | 0                 | 15.8 (3)          | 0                 | 5.9 (15)       |
| 5                                                                | 1.4 (1)           | 0                 | 0                 | 0                 | 0                 | 10.5 (2)          | 3.3 (1)           | 1.6 (4)        |
| 6A                                                               | 10.0 (7)          | 20.0 (10)         | 6.4 (3)           | 21.4 (6)          | 18.2 (2)          | 5.3 (1)           | 13.3 (4)          | 12.9 (33)      |
| 6B                                                               | 2.9 (2)           | 10.0 (5)          | 8.5 (4)           | 7.1 (2)           | 9.1 (1)           | 0                 | 10.0 (3)          | 6.7 (17)       |
| 7F                                                               | 5.7 (4)           | 2.0 (1)           | 2.1 (1)           | 0                 | 9.1 (1)           | 5.3 (1)           | 0                 | 6.7 (8)        |
| 9V                                                               | 8.6 (6)           | 6.0 (3)           | 4.3 (2)           | 7.1 (2)           | 9.1 (1)           | 0                 | 6.7 (2)           | 6.3 (16)       |
| 14                                                               | 0                 | 8.0 (4)           | 17.0 (8)          | 7.1 (2)           | 9.1 (1)           | 5.3 (1)           | 10.0 (3)          | 7.5 (19)       |
| 18C                                                              | 7.1 (5)           | 4.0 (2)           | 8.5 (4)           | 0                 | 27.3 (3)          | 5.3 (1)           | 6.7 (2)           | 6.7 (17)       |
| 19A                                                              | 4.3 (3)           | 4.0 (2)           | 4.3 (2)           | 7.1 (2)           | 0                 | 0                 | 10.0 (3)          | 4.7 (12)       |
| 19F                                                              | 12.9 (9)          | 10.0 (5)          | 8.5 (4)           | 10.7 (3)          | 0                 | 10.5 (2)          | 16.7 (5)          | 11.0 (28)      |
| 23F                                                              | 14.3 (10)         | 8.0 (4)           | 4.3 (2)           | 17.9 (5)          | 18.2 (2)          | 10.5 (2)          | 16.7 (5)          | 11.8 (30)      |
| Total                                                            | 100 (70)          | 100 (50)          | 100 (47)          | 100 (28)          | 100 (11)          | 100 (19)          | 100 (30)          | 100 (255)      |
| <b>Adults 18-40 years, HIV-infected on ART, PCV-unvaccinated</b> |                   |                   |                   |                   |                   |                   |                   |                |
| 1                                                                | 3.3 (1)           | 13.8 (4)          | 7.7 (3)           | 0                 | 0                 | 0                 | 0                 | 3.7 (8)        |
| 3                                                                | 23.3 (7)          | 34.5 (10)         | 28.2 (11)         | 27.3 (12)         | 37.5 (12)         | 36.0 (9)          | 55.6 (10)         | 32.7 (71)      |
| 4                                                                | 13.3 (4)          | 6.9 (2)           | 7.7 (3)           | 2.3 (1)           | 9.4 (3)           | 8.0 (2)           | 0                 | 6.9 (15)       |
| 5                                                                | 0                 | 0                 | 2.6 (1)           | 0                 | 0                 | 0                 | 0                 | 0.5 (1)        |
| 6A                                                               | 13.3 (4)          | 3.5 (1)           | 10.3 (4)          | 4.6 (2)           | 6.3 (2)           | 4.0 (1)           | 5.6 (1)           | 6.9 (15)       |
| 6B                                                               | 3.3 (1)           | 3.5 (1)           | 0                 | 0                 | 3.1 (1)           | 4.0 (1)           | 0                 | 1.8 (4)        |
| 7F                                                               | 0                 | 0                 | 0                 | 4.6 (2)           | 0                 | 0                 | 0                 | 0.9 (2)        |
| 9V                                                               | 3.3 (1)           | 3.5 (1)           | 5.1 (2)           | 9.1 (4)           | 3.1 (1)           | 4.0 (1)           | 0                 | 4.6 (10)       |
| 14                                                               | 0                 | 0                 | 7.7 (3)           | 9.1 (4)           | 3.1 (1)           | 8.0 (2)           | 0                 | 4.6 (10)       |
| 18C                                                              | 6.7 (2)           | 3.5 (1)           | 0                 | 9.1 (4)           | 0                 | 8.0 (2)           | 16.7 (3)          | 5.5 (12)       |
| 19A                                                              | 10.0 (3)          | 6.9 (2)           | 7.7 (3)           | 9.1 (4)           | 9.4 (3)           | 12.0 (3)          | 5.6 (1)           | 8.8 (19)       |
| 19F                                                              | 20.0 (6)          | 17.2 (5)          | 5.1 (2)           | 13.6 (6)          | 15.6 (5)          | 8.0 (2)           | 16.7 (3)          | 13.4 (29)      |
| 23F                                                              | 3.3 (1)           | 6.9 (2)           | 18.0 (7)          | 11.4 (5)          | 12.5 (4)          | 8.0 (2)           | 0                 | 9.7 (21)       |
| Total                                                            | 100 (30)          | 100 (29)          | 100 (39)          | 100 (44)          | 100 (32)          | 100 (25)          | 100 (18)          | 100 (217)      |

<sup>§</sup> There was no recruitment of these age groups during surveys 1-4



**Supplementary Table 9. Serotype-3: impact of classifying serotype-3 as NVT on carriage prevalence and prevalence ratio**

| Children 3-5 years (PCV-vaccinated)           | Survey 1 (n=286)         | Survey 2 (n=303)         | Survey 3 (n=361)         | Survey 4 (n=378)         | Survey 5 (n=371)         | Survey 6 (n=382)         | Survey 7 (n=324)         | Total (n=2405)            | cPR* (95% CI)<br>p-value      | aPR* (95% CI)<br>p-value      | Relative change |
|-----------------------------------------------|--------------------------|--------------------------|--------------------------|--------------------------|--------------------------|--------------------------|--------------------------|---------------------------|-------------------------------|-------------------------------|-----------------|
| Total carriage % (n)                          | 84.2 (241)               | 75.9 (230)               | 78.1 (282)               | 67.0 (253)               | 80.6 (299)               | 67.3 (257)               | 79.7 (258)               | 75.7 (1820)               | --                            | --                            | --              |
| 95% CI                                        | 79.5, 88.3               | 70.7, 80.6               | 73.5, 82.3               | 61.9, 71.7               | 76.2, 84.5               | 62.3, 72.0               | 74.8, 83.9               | 73.9, 77.4                |                               |                               |                 |
| VT, Excluding serotype 3                      | 16.4 (47)<br>12.6, 21.2  | 15.8 (48)<br>12.1, 20.4  | 15.5 (56)<br>12.1, 19.6  | 14.6 (55)<br>11.3, 18.5  | 14.6 (54)<br>11.3, 18.5  | 13.4 (51)<br>10.3, 17.2  | 13.0 (42)<br>9.7, 17.1   | 14.7 (353)<br>13.3, 16.2  | 0.926 (0.842, 1.018)<br>0.111 | 0.942 (0.856, 1.036)<br>0.218 | -20.7%          |
| NVT, Including serotype-3                     | 67.8 (194)<br>62.2, 73.0 | 60.1 (182)<br>54.4, 65.4 | 62.6 (226)<br>57.5, 67.5 | 52.4 (198)<br>47.3, 57.4 | 66.0 (245)<br>61.1, 70.7 | 53.9 (206)<br>48.9, 58.9 | 66.7 (216)<br>61.3, 71.6 | 61.0 (1467)<br>59.0, 63.0 | 0.964 (0.934, 0.996)<br>0.026 | 0.968 (0.937-1.000)<br>0.048  | -1.6%           |
| Children 6-8 years (PCV-unvaccinated)         | Survey 1 (n=91)          | Survey 2 (n=111)         | Survey 3 (n=139)         | Survey 4 (n=128)         | Survey 5 (n=56)          | Survey 6 (n=100)         | Survey 7 (n=70)          | Total (n=695)             | cPR* (95% CI)<br>p-value      | aPR* (95% CI)<br>p-value      | Relative change |
| Total carriage % (n)                          | 67.1 (61)                | 65.8 (73)                | 63.3 (88)                | 43.0 (55)                | 55.3 (31)                | 52.0 (52)                | 61.4 (43)                | 58.0 (403)                | --                            | --                            | --              |
| 95% CI                                        | 56.4, 76.5               | 56.2, 74.5               | 54.7, 71.3               | 34.3, 52.0               | 41.5, 68.7               | 41.8, 62.1               | 49.0, 72.8               | 54.2, 61.7                |                               |                               |                 |
| VT, Excluding serotype 3                      | 22.0 (20)<br>14.6, 31.7  | 17.1 (19)<br>11.2, 25.3  | 15.8 (22)<br>10.6, 22.9  | 12.5 (16)<br>7.8, 19.5   | 8.9 (5)<br>3.7, 19.9     | 10.0 (10)<br>5.4, 17.7   | 15.7 (11)<br>8.9, 26.3   | 14.8 (103)<br>12.3, 17.7  | 0.812 (0.680, 0.970)<br>0.021 | 0.844 (0.699, 1.019)<br>0.078 | -28.6%          |
| NVT, Including serotype 3                     | 45.1 (41)<br>35.1, 55.4  | 48.7 (54)<br>39.4, 57.9  | 47.5 (66)<br>39.3, 55.8  | 30.5 (39)<br>23.1, 39.0  | 46.4 (26)<br>33.8, 59.6  | 42.0 (42)<br>32.7, 51.9  | 45.7 (32)<br>34.4, 57.5  | 43.2 (300)<br>39.4, 46.9  | 0.948 (0.872, 1.031)<br>0.214 | 0.959 (0.878, 1.047)<br>0.347 | +1.3%           |
| Adult, HIV-infected on ART (PCV-unvaccinated) | Survey 1 (n=198)         | Survey 2 (n=201)         | Survey 3 (n=279)         | Survey 4 (n=308)         | Survey 5 (n=305)         | Survey 6 (n=277)         | Survey 7 (n=202)         | Total (n=1770)            | cPR* (95% CI)<br>p-value      | aPR* (95% CI)<br>p-value      | Relative change |
| Total carriage % (n)                          | 39.4 (78)                | 47.3 (95)                | 43.4 (124)               | 42.9 (132)               | 38.4 (117)               | 32.5 (90)                | 38.7 (78)                | 40.4 (714)                | --                            | --                            | --              |
| 95% CI                                        | 32.5, 46.6               | 40.2, 54.4               | 38.5, 50.5               | 37.3, 48.6               | 32.9, 44.1               | 27.0, 38.4               | 31.9, 45.7               | 38.0, 42.7                |                               |                               |                 |
| VT, Excluding serotype 3                      | 11.6 (23)<br>7.8-16.9    | 9.5 (19)<br>6.1-14.4     | 10.0 (28)<br>7.0-14.2    | 10.4 (32)<br>7.4-14.3    | 6.6 (20)<br>4.3-10.0     | 5.8 (16)<br>3.6-9.2      | 4.0 (8)<br>2.0-7.7       | 8.3 (146)<br>7.1-9.6      | 0.783 (0.673, 0.912)<br>0.002 | 0.763 (0.655, 0.888)<br>0.000 | -65.5%          |
| NVT, Including serotype 3                     | 27.8 (55)<br>22.0, 34.4  | 37.8 (76)<br>31.4, 44.7  | 33.4 (96)<br>29.1, 40.2  | 32.5 (100)<br>27.5, 37.9 | 31.8 (97)<br>26.8, 37.3  | 26.7 (74)<br>21.8, 32.2  | 34.7 (70)<br>28.4, 41.5  | 32.1 (568)<br>29.9, 34.3  | 0.970 (0.908, 1.037)<br>0.373 | 0.966 (0.904, 1.032)<br>0.309 | +24.8%          |

cPR=crude prevalence ratio. aPR=adjusted ratio. CI=confidence interval. VT=vaccine serotype, NVT=non-vaccine serotype. PCV=pneumococcal conjugate vaccine

## Supplementary Note 1. Details of the Non-linear regression analysis framework

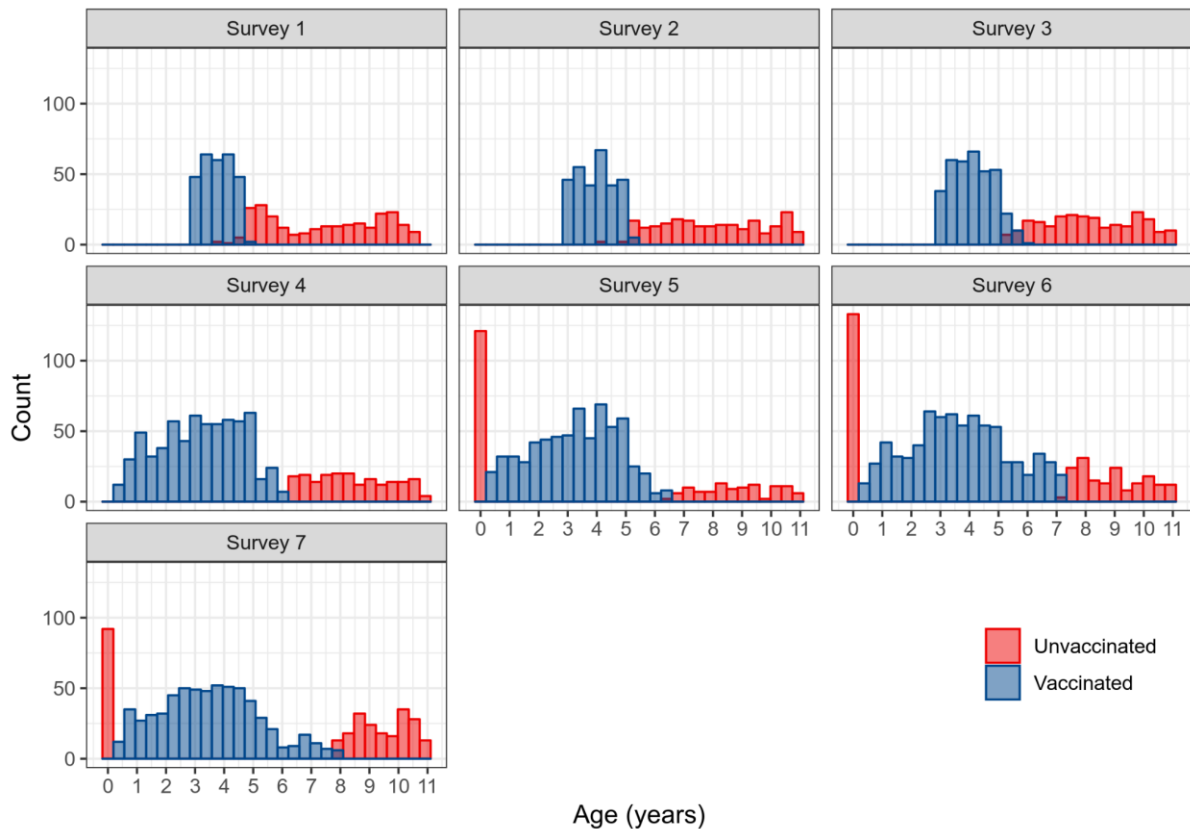

**Supplementary Figure 2. Age distribution of PCV-unvaccinated and PCV-vaccinated children.** Red and blue bars represent PCV-unvaccinated and PCV-vaccinated children, respectively. The x-axis is age in years old. The y-axis shows the count (frequency) of children. Each bar represents a 4-months progression in age.

**Summary description of the non-linear regression analysis:** To better understand the rate at which VT and NVT carriage prevalence was decreasing, we developed a model to describe the variation in an individual's probability of VT or NVT carriage with age, adjusted for age at recruitment. The model is fitted using carriage data from children 3-6 to 10 years of age, maximising overlap of empirical data. Model outputs for individual carriage probability were then transformed into a population-level (decay) half-life of each VT and NVT carriage. By calculating the effect of not receiving the vaccination ( $\beta$ ), we can then begin to define the benefit of vaccine-induced immunity in lowering an individual's risk of VT carriage at different ages after receiving PCV vaccination. This was then extrapolated to define the rate of reduced VT carriage within the studied population. Further analyses, not currently available, should include a measure of other contributing factors, including waning maternal and developing naturally acquired immunity.

### Model specification, VT

In this cross-sectional study, the response (i.e. VT carrier or not) for each child is a single binary variable,  $Y_i = 1/0$  representing presence/absence of VT carriage at the time of measurement (i.e. sample collection), with respective probabilities  $p_i$  and  $1 - p_i$ .

The modelled probability,  $p_i$ , of VT carriage for an individual child  $i$  is  $\alpha\beta\exp\{-\delta_u(\text{age}_i - t_c)\}$  if the child is unvaccinated and  $\alpha\exp\{-\delta_v(\text{age}_i - t_c)\}$  if vaccinated, where  $\text{age}_i$  is the age in years of child  $i$  at time of measurement,  $t_c$  is the time at which we censor the data (3.6 years),  $\beta$  is the effect of not receiving the vaccination,  $\delta_u$  and  $\delta_v$  are the rate of decay of VT carriage

prevalence with age for unvaccinated and vaccinated children, respectively, and  $\alpha$  is the VT carriage prevalence for vaccinated children at time  $t_c$ .

All parameters estimated in the model are calculated using the maximum likelihood, as also specified in the main manuscript.  $Y_i$  is distributed as a Bernoulli with probability  $p_i$  specified according to the equations above. From this we can calculate the likelihood and then find the parameters that maximise that likelihood.

**Supplementary Table 10. Summary of parameters**

|                                                                                                                     | VT carriage, Yes                                                           | VT carriage, No (NVT or no carriage) |
|---------------------------------------------------------------------------------------------------------------------|----------------------------------------------------------------------------|--------------------------------------|
| Variable for carriage status                                                                                        | 1                                                                          | 0                                    |
| Probability of VT carriage                                                                                          | $p_i$                                                                      | $1 - p_i$                            |
| <b>Modelling parameter (<math>p_i</math>) (=probability of VT carriage for an individual child, <math>i</math>)</b> |                                                                            |                                      |
| Unvaccinated                                                                                                        | $\alpha\beta\exp\{-\delta_u(\text{age}_i - t_c)\}$                         |                                      |
| Vaccinated                                                                                                          | $\alpha\exp\{-\delta_v(\text{age}_i - t_c)\}$                              |                                      |
| $\text{age}_i$                                                                                                      | age in years of child $i$ at time of measurement                           |                                      |
| $t_c$                                                                                                               | time at which we censor the data (3.6 years)                               |                                      |
| $\beta$                                                                                                             | effect of not receiving the vaccination                                    |                                      |
| $\delta_u$                                                                                                          | rate of decay of VT carriage prevalence with age for unvaccinated children |                                      |
| $\delta_v$                                                                                                          | rate of decay of VT carriage prevalence with age for vaccinated children   |                                      |
| $\alpha$                                                                                                            | VT carriage prevalence for vaccinated children at time $t_c$ .             |                                      |

**Supplementary Table 11. Alpha and beta values for PCV-vaccinated and -unvaccinated children<sup>1</sup>**

| Parameter                                                                                                        | 3-6 years old      | 4 years old        | 4-5 years old      | 5 years old        | 5-5 years old      | 6 years old        | 6-5 years old      | 7 years old        |
|------------------------------------------------------------------------------------------------------------------|--------------------|--------------------|--------------------|--------------------|--------------------|--------------------|--------------------|--------------------|
| VT carriage prevalence (with 95% CI) at censoring age (3-6 years) for vaccinated children ( $\alpha$ )           | 0.22<br>0.19, 0.25 | 0.22<br>0.19, 0.25 | 0.20<br>0.17, 0.23 | 0.20<br>0.16, 0.24 | 0.17<br>0.12, 0.23 | 0.16<br>0.10, 0.26 | 0.19<br>0.08, 0.38 | 0.06<br>0.03, 0.13 |
| VT Carriage prevalence (with 95% CI) at censoring age (3-6 years) for unvaccinated children ( $\alpha * \beta$ ) | 0.47<br>0.43, 0.51 | 0.47<br>0.43, 0.51 | 0.45<br>0.42, 0.48 | 0.40<br>0.36, 0.45 | 0.36<br>0.30, 0.41 | 0.30<br>0.23, 0.40 | 0.25<br>0.12, 0.45 | 0.20<br>0.16, 0.27 |
| Effect of not receiving the vaccination ( $\beta$ )                                                              | 2.21<br>1.51, 2.92 | 2.21<br>1.51, 2.92 | 2.26<br>1.57, 2.95 | 2.0<br>1.38, 2.62  | 2.13<br>1.29, 2.98 | 1.85<br>0.83, 2.88 | 1.33<br>0.23, 2.43 | 3.39<br>0.59, 6.18 |

<sup>1</sup>Low sample sizes does not allow for a robust analysis beyond seven years of age. CI= Confidence interval. VT=Vaccine serotype.

### Goodness-of-fit and limitations of the non-linear regression analysis

The conventional way to assess goodness-of-fit of a regression model is to plot standardised residuals against predicted (fitted) values; in a well-fitting model, the plot should show no discernible structure. However, individual residuals from a model with binary response are unreliable. Instead, we use grouped residuals as follows. Within each of the unvaccinated and vaccinated sets of children, order the estimated probabilities  $p_i$  from smallest to largest. Choose a group size,  $k$ . The first grouped predicted value is the sum  $s_1 = p_1 + \dots + p_k$ , and the first standardised grouped residual is  $r_1 = \{(Y_1 + \dots + Y_k) - s_1\} / \sqrt{(v_1)}$  where  $Y_i = 0/1$  denotes absence/presence of VT carriage in the  $i$ th child and  $v_1 = p_1(1 - p_1) + \dots + p_k(1 - p_k)$ . The second grouped predicted value and standardised residual are calculated in the same way using the next  $k$  ordered  $p_i$ , and so on.

Supplementary figure 3 shows the resulting plot, using  $k = 125$  and  $k = 93$  for unvaccinated and vaccinated children, respectively, to give 15 groups in each of the two sets. The plot indicates a good fit in that (a) there is no discernible relationship between the residual and predicted values, and (b) the range of the residuals, from approximately -2 to +2, is compatible

with their theoretical mean and standard deviation of 0 and 1, respectively, if the model is correct.

The major limitation of the analysis reported here is the inability of our model to extrapolate before the censoring time  $t_c$  with a reasonable amount of uncertainty. This is due to the small overlap in the age ranges of vaccinated and unvaccinated children and to the fact that the VT carriage dynamic for vaccinated children is too complex to capture, with the available data, in the early years of life.

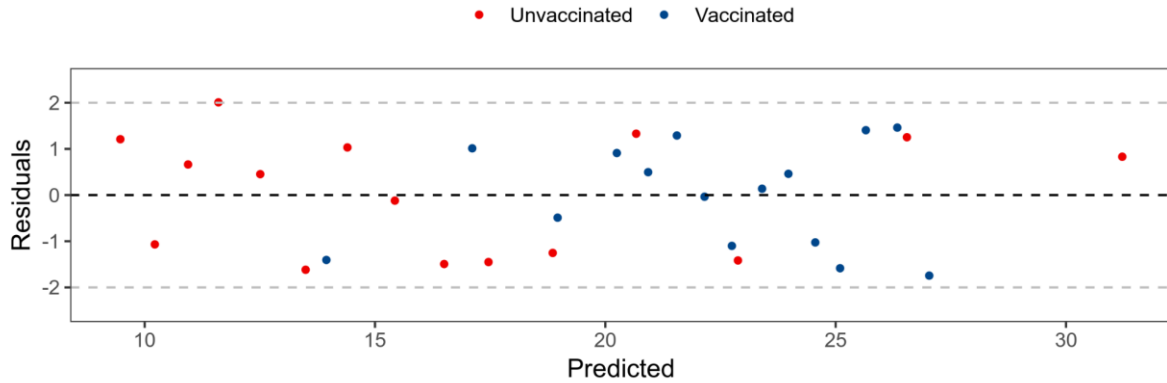

**Supplementary Figure 3. Plot of standardised grouped residuals against predicted values.** The major limitation of the analysis reported here is the inability of our model to extrapolate before the censoring time  $t_c$  with a reasonable amount of uncertainty. This is due to the small overlap in the age ranges of vaccinated and unvaccinated children and to the fact that the VT carriage dynamic for vaccinated children is too complex to capture, with the available data, in the early years of life.

## Supplementary References

- 1 Dunne, E. M. et al. Effect of ten-valent pneumococcal conjugate vaccine introduction on pneumococcal carriage in Fiji: results from four annual cross-sectional carriage surveys. *Lancet Glob. Health* **6**, e1375–1385 (2018).
- 2 Collins, D. A. et al. Predictors of pneumococcal carriage and the effect of the 13-valent pneumococcal conjugate vaccination in the Western Australian Aboriginal population. *Pneumonia* **9**, 14 (2017).
- 3 Sigaúque, S. et al. Early Declines in Vaccine Type Pneumococcal Carriage in Children Less Than 5 Years Old After Introduction of 10-valent Pneumococcal Conjugate Vaccine in Mozambique. *Pediatr. Infect. Dis. J.* **37**, 1054–1060 (2018).
- 4 Hammitt, L. L. et al. Effect of ten-valent pneumococcal conjugate vaccine on invasive pneumococcal disease and nasopharyngeal carriage in Kenya: a longitudinal surveillance study. *Lancet* **393**, 2146–2154 (2019).
- 5 Heinsbroek, E. et al. Pneumococcal carriage in households in Karonga District Malawi, before and after introduction of pneumococcal conjugate vaccination. *Vaccine* **36**, 7369–7376 (2018).
- 6 Hammitt, L. L. et al. Indirect Effect of Conjugate Vaccine on Adult Carriage of *Streptococcus pneumoniae*: An Explanation of Trends in Invasive Pneumococcal Disease. *J. Infect. Dis.* **193**, 1487–1494 (2006).
- 7 Spijkerman, J. et al. Carriage of *Streptococcus pneumoniae* 3 Years after Start of Vaccination Program, the Netherlands. *Emerg. Infect. Dis.* **17**, 584–591 (2011).
- 8 van Hoek, A. J. et al. Pneumococcal carriage in children and adults two years after introduction of the thirteen valent pneumococcal conjugate vaccine in England. *Vaccine* **32**, 4349–4355 (2014).
- 9 Flasche, S. et al. Effect of Pneumococcal Conjugate Vaccination on Serotype-Specific Carriage and Invasive Disease in England: A Cross-Sectional Study. *PLoS Med.* **8**, e1001017 (2011).
